# Supplementary material for: ML-AMPSIT: Machine Learning-based Automated Multi-method Parameter Sensitivity and Importance analysis Tool
Source: Copernicus journal article supplement (doi:10.5194/gmd-2024-56), 2024-04-18
Supplement: Supplementary file [file gmd-2024-56-AC4-supplement.pdf]

## CC1 Comments and responses

We thank Benjamin Püschel, Isabella Winterer, Prof. Andreas Stohl and Dr. Stefano Serafin for their insightful comments. We appreciate that you have chosen our paper for your seminar course. Your detailed suggestions will be very useful to improve the quality of the paper. Thanks! Below, we address each comment in detail and outline the corresponding actions we have taken.

**Major Comment:** Sec. 2.3.1-2.3.7 & L80-82 While it is stated that the included ML methods are among the most commonly used, further justification is needed as to why exactly these seven methods are utilized. In particular, the utilization of tree-based methods requires explanation, as they demonstrate lower performance compared to other methods. Could they perform better or give additional insights in other cases? Otherwise, they might not be useful enough to be included in the tool.

**Reply:** The choice of the algorithms was primarily influenced by their prevalence in the literature, particularly in other earth science fields concerning landslide susceptibility, fire susceptibility, etc. Moreover, the appeal of these algorithms lies in their simplicity and speed, attributes that are not always guaranteed by more advanced ML-based algorithms. As stated in the text, the potential unpredictability of one or more factors affecting the performance of a specific algorithm usually necessitates a trial-and-error approach. This means that an algorithm that performs poorly in one scenario might perform well in another, underscoring the scenario-adaptability nature of the multi-method approach proposed in this study. While tree-based methods performed worse in this case study, another more complex case study was explored (to be the focus of a new paper), where non-linearities were stronger, and non-linear regressors such as tree-based methods performed much better than linear regressions.

**Action:** We have added the following text to enhance clarity about the algorithm selection:

In the Introduction:

”These algorithms have been chosen for their simplicity and speed and to create an ensemble of state-of-the-art ML models each employing distinct methodologies, so as to improve the flexibility of the tool and its performance in different possible applications. This diversity allows for a robust method of self-validation or

self-falsification of the results through comparative analysis, enhancing the reliability of the findings by ensuring that consistent results are not an artifact of a single modeling approach”

In the conclusions:

”The advantage of implementing different methods, also within the same family of algorithms, is multifaceted. First, if different algorithms produce consistent results, this consistency increases the reliability and robustness of the outcome. Moreover, after assessing the consistency of the results between different models of the same family, it could be more convenient to rely on the fastest method instead of the most accurate. Second, the use of different families of algorithms extends the applicability and flexibility of the tool, as their performance can vary in different scenarios.”

**Major Comment:** Sec. 2.3.1-2.3.5 We suggest a more detailed description of how feature importance is calculated/extracted for the methods LASSO, Support Vector Machine, Classification and Decision Trees, Random Forest, Extreme Gradient Boosting. We realized that the sum of the importances of all features does not equal 1 for all ML methods, suggesting that the feature importances are not normalized (e.g. Figs 10 & 11). However, non-normalized feature importances would not allow for direct comparisons of values between different ML methods (as done in e.g. L443-446). An explanation of the feature importance calculation would greatly clarify these ambiguities.

**Reply:** Thanks for the suggestion and for noting that in some cases the sum of the feature importance was not 1. Indeed, we recognize that the original manuscript did not clearly convey how feature importance is evaluated for each of the surrogate models used. Moreover, most feature importance methods result in normalized values except for SVM and LASSO, which are now normalized in the new manuscript version. This now allows for a direct comparison between the different ML algorithms.

**Action:** We have added the following section to enhance clarity about Feature importance computation:

### **Feature importance computation**

Each of the algorithms implemented in this study provides a method for calculating feature importance, albeit through different approaches. In principle, a single sensitivity method could be used to evaluate feature importance across all algorithms. However, some algorithms have built-in methods specifically designed to align with their inherent characteristics.

- Fitting Methods: LASSO and SVM derive feature importance from the model coefficients. In these linear models, the magnitude of the coefficients indicates the strength and direction of the relationship between each feature and the target variable. Specifically, in the `scikit-learn` library, this can be accessed through the `best_estimator_.coef_` attribute. Larger absolute values of these coefficients indicate greater importance.
- Tree-based algorithms: for CART, RF, and XGboost, feature importance is assessed using the Mean Decrease in Impurity (MDI) method. This method quantifies the contribution of each feature to the overall prediction accuracy by measuring how much each feature decreases the impurity of the splits in which it is involved. For RF and XGboost, the final value is obtained by averaging over all the trees in the ensemble. In `scikit-learn`, these contributions are accessible through the `feature_importances_` attribute. The MDI method is particularly effective because it directly measures the impact of each feature on the model's decision process, providing a clear indication of feature importance.
- Probabilistic methods: GPR and BRR do not have a built-in mechanism for directly assessing feature importance. Therefore, in this work, the Sobol method was used to infer feature importance. Once built and tested against the original model outputs, the GPR and BRR surrogate models can be used to perform a GSA in substitution of the original model. By using a surrogate model, the computational cost of running the original model for a large number of input combinations is avoided. Instead, the surrogate model can be used to generate a large number of input combinations with significantly less computational time and evaluate their impact on the output. Over these samples, in ML-AMPSIT the Sobol sensitivity indices are computed following the definition proposed by Saltelli et al. (2008). The user can then compare the Sobol indices evaluated with both GPR and BRR, providing information on

their robustness and reliability. In the proposed tool, after the algorithm generates the optimal surrogate model, it uses the Python library `SALib` to compute the Sobol first-order index as a score for the sensitivity importance of each parameter. The Sobol total index and Sobol second-order interaction term are available for users who wish to examine the presence of strong parameter interactions.

Despite the differences in the feature importance calculation approaches of the different algorithms, each method is applied to standardized, non-dimensional data and each feature importance set is scaled between  $[0,1]$ . This ensures that feature importance scores are comparable across models. The primary objective of all these methods is to quantify the sensitivity of the model output to changes in the input features. Consequently, the feature importance scores obtained from these different methods provide a well-posed comparison of parameter sensitivities. By evaluating and comparing these scores, it is possible to gain a comprehensive understanding of the relative importance of each feature across different modeling approaches, which increases the robustness of the results.”

**Major Comment:** Sec. 2.3.8 The algorithm depends on an initial guess of the plausible ranges of the hyperparameters/features whose importance is being estimated. The range boundaries of the six tested hyperparameters are not clearly justified in this work, and they do not seem to be adjustable by the user (in `configAMPSIT.json`). Likely, the feature importance estimate will be inaccurate if the initial parameter ranges are unrealistic. Some additional discussion of this aspect, and greater flexibility in the configuration of the algorithm, would be desirable.

**Reply:** Thanks for this comment. Indeed, in the old version of the manuscript we forgot to explicitly mention the range of variability of the parameters considered in the sensitivity analysis. This was only present in the configuration file in Figure A1 in the Appendix. The range of variation of the parameters is indeed a central topic in sensitivity analysis. In the simple idealized case study presented in this paper to show the functionalities of ML-AMPSIT, we decided to use maximum variations of 50% of the default parameter value, which we checked to be compatible with the natural variability of each parameter without generating unphysical situations.

ML-AMPSIT allows users to change the percentage of variation for each parameter and to use different percentages for each parameter. The provided

example of the file `configAMPSIT.json` shows the array defining the reference value and perturbation percentage for each parameter, both of which are required to be defined by the user.

**Action:** We have added the following statement to underline the importance of the parameters' ranges:

"The final perturbed model parameter ensemble contains 100 samples, each with different parameter values based on the associated Sobol sequences. The input ensemble is generated by perturbing the parameters by up to 50% of their reference value in the look-up table `MPTABLE.TBL`. It should be clear that the results of a sensitivity analysis, regardless of the approach chosen, always depend on the range of exploration of the parameters, and that their transferability to arbitrary ranges of values is not guaranteed if the true sensitivity of the parameters in unexplored ranges is not known a priori. The perturbation percentage in this work has been chosen to avoid unphysical values, but it must be noted that the aim of the present work is to introduce and test ML-AMPSIT functionalities in a simplified case study, while a more detailed analysis would require more attention to the choice of the parameter space."

**Major Comment:** The paper is highly technical but lacks physical interpretation of the results. Physical explanations like the one given in lines 434-435 should be added also elsewhere. This would help the readers to better understand the usefulness of the tool in the concrete case presented.

**Reply:** The main objective of this paper is to present the new tool to the community for potential users, describing how it implements a sensitivity analysis methodology that accounts for commonly missing factors in the present literature, such as the non-linearity nature of the input-output response and the complex interactions between parameters in high-dimensional problems. Therefore, the key points of this study are oriented toward the implementation of advanced sensitivity analysis methods considered to be too computationally expensive for numerical weather prediction models, which potentially become fast and cheap through the use of surrogate models. The user-oriented nature of the tool required a comprehensive description of the workflow and the introduction of a minimum background concerning the implemented models, which covered most of the paper. We appreciate however

the suggestion to delve more into the physical interpretation of the results, which could be beneficial also for the above-mentioned main aims of the paper.

**Action:** We have inserted additional parts in the text to expand the physical interpretation of the results, e.g.:

”In particular, Z0MVT and RHOL\_NIR alternate as the most important parameters, with RHOL\_NIR dominating for most of the day, whereas Z0MVT becomes more important close to sunrise and sunset. The short time windows in which Z0MVT appears as the dominant parameter correspond to the phases in which the vertical wind profile over land showcases the most pronounced shear in the lowest layers, as shown in Figure 5a,e. This seems to indicate a stronger role of surface friction in dictating ensemble variability when stronger winds are present (Z0MVT directly influences surface friction).”

”Conversely to the decreasing vertical importance of Z0MVT, the importance of LAI\_MAR and RHOL\_NIR tends to increase with height (Figure 13). The vertical importance ranking converges to the water region scenario shown in Figure 14 above the lowest two vertical levels at 06:00 UTC and above the lowest 5-6 vertical levels at 18:00 UTC, i.e., above the height at which friction is playing the most important role. On the other hand, when the wind speed is weak, i.e., at 00:00 UTC and 12:00 UTC, the vertical profile of the parameters’ importance values is similar over land and water at all the vertical levels investigated.”

”The results are more uniform over water than over land, and the ranking of the parameters does not show significant variations during the whole day. In particular, the dominant parameters are RHOL\_NIR and LAI\_MAR, with Z0MVT always showing low importance values. Since the sea breeze is driven by thermal contrasts, it is expected that the parameters mainly affecting temperature, such as the reflectivity and the leaf area index, are also particularly significant for this case study. Among the selected parameters, RHOL\_NIR plays a central role in the main radiative processes in Noah-MP, modulating the overall canopy albedo,

defining the scattered fraction of leaf intercepted radiation, and ultimately entering the computation of all radiation fluxes. LAI is involved in important processes, such as determining the canopy gaps, the fraction of vegetation exposed to sunlight, and significantly affects both sensible and latent heat fluxes, as well as the leaf boundary resistance. Although HVT might be expected to be more important due to its influence on radiation and heat trapping, its importance is probably limited by the low canopy height in the selected grassland vegetation class. CWPVT, which enters the canopy wind extinction computation, and DLEAF, which mainly affects leaf boundary resistance, were expected to play a minor role in this setup with respect to the other parameters, mainly due to their secondary role in Noah-MP.”

**Minor Comment:** In the model setup, while other boundary conditions are reported, the sea surface temperatures used are not.

**Action:** The sea surface temperature has been added to the model setup description.

**Minor Comment:** Reduce the number of plots/subplots, especially if they don't contain additional information. e.g. only show subplots with interesting vertical variation of Figs 12 & 13; One plot showing the mean vertical variation in MSE over land instead of Fig 14 & 15 would be enough to visualize the takeaways in L460-465.

**Action:** We have reduced the number of subplots of the mentioned Figures to showcase 4 timestamps instead of 8, to convey only the main concepts. Concerning other Figures, such as Figs 8-11, the repetitiveness of plots containing the same information is still considered very important to underline the benefits of a multi-method approach, which is one of the main aims of this paper. The agreement between the different models strengthens the reliability of the results and provides a form of self-validation, which is at the core of the ML-AMPSIT's robustness strategy.

**Minor Comment:** The quality of most figures is not entirely satisfying but could be improved with relatively little effort. For instance:

- Add a grid to the background of all figures.

- Increase font size in legends of Figs 3 & 4.
- Increase font size of labels in Fig 5 and title of subplot c).
- Add a second y-axis for the p-value in Figs 5, 8, 9 as it is close to 0.
- Swap x- and y-axis in Figs 12, 13, 14, 15 since height coordinates are usually represented on the y-axis.
- Increase line width and use both colors and line styles to differentiate between lines in all plots. This would greatly increase visibility, especially for color-blind people.
- Is there a reason why the area under the curves is colored in the feature importance timeseries? (Figs 5, 10, 11).

**Reply:** Thanks for these very valuable suggestions. We have implemented all of them to improve the quality and readability of the figures.

**Action:** All suggested improvements have been implemented in the manuscript

**Minor Comment:** Typos in L123, 128, 151, 170, Fig 1: scriptnames should be \*.ipynb instead of \*.ipybn.

**Action:** The typo has been corrected.

**Minor Comment:** L432 Fig 11 should be linked.

**Action:** We have added a link to Fig 11.

**Minor Comment:** The paragraph L411-422 could link to Figs 8 & 9 more often for clarity and convenience of reading.

**Action:** The links to Figs 8 & 9 have been increased for clarity.
